# Supplementary material for: Structural elucidation of a mononuclear titanium methylidene
Source: Royal Society of Chemistry journal article supplement (doi:10.1039/c7cc00654c), 2017-01-01
Supplement: c7cc00654c1.pdf [file c7cc00654c1.pdf]

**Supporting Information for:**

**Structural Elucidation of a Mononuclear Titanium Methylidene**

Lauren N. Grant,<sup>a</sup> Seihwan Ahn,<sup>b,c</sup> Brian C. Manor,<sup>a</sup> Mu-Hyun Baik,<sup>b,c\*</sup> and Daniel J. Mindiola<sup>a\*</sup>

<sup>a</sup>*Department of Chemistry, University of Pennsylvania, Philadelphia, PA 19104.* <sup>b</sup>*Department of Chemistry, Korea Advanced Institute of Science and Technology, Daejeon, 34141, South Korea.*

<sup>c</sup>*Institute for Basic Science, Center for Catalytic Hydrocarbon Functionalizations, Daejeon, 34141, South Korea.*

E-mail: mbaik2805@kaist.ac.kr; mindiola@sas.upenn.edu

**Table of Contents**

|                                                  |         |
|--------------------------------------------------|---------|
| Experimental Details                             | S2-S4   |
| NMR Spectral Data                                | S4-S10  |
| Molecular Structures and Crystallographic Tables | S10-S14 |
| Computational Details                            | S15     |
| Cartesian Coordinates of All Computed Structures | S16-S23 |
| References                                       | S24     |

## Experimental Details

### General Procedures

Unless otherwise stated, all operations were performed in a M.Braun Lab Master double-dry box under an atmosphere of purified dinitrogen or using high vacuum standard Schlenk techniques under an argon or dinitrogen atmosphere. Anhydrous solvents were purchased from Fisher Scientific or Aldrich. All anhydrous solvents were sparged with argon for 20 minutes and dried by passage through two columns of activated alumina and Q-5 drying agent in a Grubbs-type solvent system. Stabilizer-free Et<sub>2</sub>O and THF were purchased from Fisher Scientific and dried by passage through two columns of activated alumina. Deuterated benzene and deuterated toluene were purchased from Cambridge Isotope Laboratories (CIL) and was sparged with argon for 20 minutes, then was dried over 4 Å sieves, and degassed by freeze–pump–thaw cycles. All solvents were transferred into a dry box and were stored over 4 Å sieves. All sieves were heated to 200 °C under vacuum overnight prior to use. Celite used for filtrations was also heated to 200 °C under vacuum overnight prior to use. Solution state magnetic susceptibility was measured by the Evans<sup>[1]</sup> method in benzene-d<sub>6</sub>/tetramethylsilane solution at 298 K. Corrections were applied for diamagnetism calculated for Pascal constants.<sup>[2]</sup> (PN)<sub>2</sub>TiCl<sub>2</sub>,<sup>[3]</sup> the aryl oxyl radical •OMes\* (Mes\* = 2,4,6-<sup>t</sup>Bu<sub>3</sub>C<sub>6</sub>H<sub>2</sub>),<sup>[4]</sup> H<sub>2</sub>CPPh<sub>3</sub>,<sup>[5]</sup> and [FeCp<sub>2</sub>][OTf]<sup>[6]</sup> were prepared according to published literature procedures. NMR spectra were recorded on a Bruker UNI 400 MHz spectrometer for <sup>1</sup>H and <sup>31</sup>P{<sup>1</sup>H} spectra. <sup>13</sup>C NMR spectra were recorded on a cryo500. <sup>1</sup>H and <sup>13</sup>C NMR chemical shifts are reported referenced to the internal residual proton or carbon resonances of C<sub>6</sub>D<sub>6</sub> (δ = 7.16 ppm or 128.06 ppm). <sup>19</sup>F and <sup>31</sup>P NMR chemical shifts are reported with respect to external CF<sub>3</sub>CO<sub>2</sub>H (δ –78.5 ppm) and H<sub>3</sub>PO<sub>4</sub> (δ 0.0 ppm).

### Synthesis of (PN)<sub>2</sub>Ti(CH<sub>3</sub>) (1)

A dark brown solution of (PN)<sub>2</sub>TiCl<sub>2</sub> (294 mg, 0.38 mmol, 1 equiv.) in 5 mL of toluene was cooled to -35 °C for 30 mins in a 20 mL vial. To this solution was added an ethereal solution of 1.6 M LiCH<sub>3</sub> (0.24 mL, 0.38 mmol, 1 equiv.) dropwise, over a period of 3 minutes. An immediate color change to dark green was observed during this time. The reaction mixture was stirred at room temperature for 15 minutes, followed by removal of all volatiles. The green residue was then dissolved in 15 mL diethyl ether, filtered through Celite, and the filtrate concentrated to 5 mL. This concentrated solution was then layered with 10 mL *n*-hexanes and stored at -35 °C overnight, resulting in the deposition of a dark green powder. To isolate this material, the solution was rapidly filtered cold and the solid dried *in vacuo*. Total collected was 278 mg (0.37 mmol, 98% yield). In order to grow single crystals suitable for X-ray diffraction studies, half of the powder product from the isolated reaction mixture (140 mg) was dissolved in 10 mL ether, and stored at -35 °C overnight without further filtration to yield green single plates of complex 1.

<sup>1</sup>H NMR (400 MHz, 298 K, benzene-d<sub>6</sub>): δ 11.98 (br, Δv<sub>1/2</sub> = 5.7 Hz, 2 H, meta-ArH<sub>Tolyl</sub>), 9.37 (s, 2 H, meta-ArH<sub>Tolyl</sub>), 8.23 (br, Δv<sub>1/2</sub> = 65.2 Hz, 2 H, ortho-ArH<sub>Tolyl</sub>), 8.14 (s, 4 H, meta-ArH<sub>Mesityl</sub>), 4.29 (s, 12 H, ortho-CH<sub>3</sub><sub>Mesityl</sub>), 3.31 (s, 6 H, para-CH<sub>3</sub><sub>Tolyl</sub>), 2.80 (s, 6 H para-CH<sub>3</sub><sub>Mesityl</sub>), 2.39 (br, Δv<sub>1/2</sub> = 33.2 Hz, 12 H, P-CH-CH<sub>3</sub>), 1.37 (s, 3 H, Ti-CH<sub>3</sub>) 0.49 (br, 4 H ea, P-CH-CH<sub>3</sub>). Some

residual solvents such as *n*-hexanes and *n*-pentane are present based on the  $^1\text{H}$  NMR spectrum.  $\mu_{\text{eff}} = 2.03 \mu_{\text{B}}$ , 25 °C,  $\text{C}_6\text{D}_6$ , Evans' method.

### Synthesis of $(\text{PN})_2\text{Ti}(\text{CH}_3)(\text{OTf})$ (**2**)

To a dark green solution of **1** in 5 mL THF in a 20 mL vial (224.5 mg, 0.3 mmol, 1 equiv.) was added a 10 mL THF slurry of  $[\text{FeCp}_2][\text{OTf}]$  (101.5 mg, 0.3 mmol, 1 equiv.) at room temperature while stirring. A color change to dark red was observed, whereby all  $[\text{FeCp}_2][\text{OTf}]$  was consumed as it was added, instantaneously resulting in a homogeneous bright red solution. As monitored by  $^1\text{H}$  NMR spectroscopy, complex **1** is converted quantitatively to complex **2**. Removal of volatiles after stirring at room temperature for 30 minutes provides a pure powder that can be used for NMR characterization. Complex **2** is cleanly formed along with  $\text{FeCp}_2$  based on the  $^1\text{H}$  NMR spectrum. Given the clean conversion of **1** to complex **2**, it is possible to conduct *in situ* experiments with the crude material without need for separation from the  $\text{FeCp}_2$ . The details below rely on the use of crude mixture for the synthesis of complex **3**.

$^1\text{H}$  NMR (400 MHz, 298 K, benzene- $d_6$ ):  $\delta$  6.70 (s, 4H, *meta*- $\text{ArH}_{\text{Mesityl}}$ ), 6.55, (br,  $\Delta\nu_{1/2} = 3.3$  Hz, 2 H, *meta*- $\text{ArH}_{\text{Tolyl}}$ ), 6.53 (s, 2 H, *meta*- $\text{ArH}_{\text{Tolyl}}$ ), 5.48 (dd,  $^3J_{\text{H-H}} = 3.5$  Hz, 2H, *ortho*- $\text{ArH}_{\text{Tolyl}}$ ), 3.60 (s, 12 H, *ortho*- $\text{CH}_3_{\text{Mesityl}}$ ), 2.82 (sept,  $^3J_{\text{H-H}} = 3.5$  Hz, 2 H, P-CH- $\text{CH}_3$ ), 2.57 (sept,  $^3J_{\text{H-H}} = 3.3$  Hz, 2 H, P-CH- $\text{CH}_3$ ), 2.31 (s, 6 H, *para*- $\text{CH}_3_{\text{Tolyl}}$ ), 2.19 (s, 6 H *para*- $\text{CH}_3_{\text{Mesityl}}$ ), 1.69 (t,  $^3J_{\text{H-H}} = 9.1$  Hz, 3 H, Ti- $\text{CH}_3$ ), 1.54 (m, 3 H, P-CH- $\text{CH}_3$ , coupling constant not assignable due to overlapping resonances), 1.48 (m, 3 H, P-CH- $\text{CH}_3$ , coupling constant not assignable due to overlapping resonances), 1.26 (m, 3 H, P-CH- $\text{CH}_3$ , coupling constant not assignable due to overlapping resonances).  $^{31}\text{P}\{^1\text{H}\}$  NMR (162 MHz, 298 K, benzene- $d_6$ ):  $\delta$  17.45 ppm.  $^{19}\text{F}$  NMR (282 MHz, 298 K, benzene- $d_6$ ):  $\delta$  -76.49 ppm.  $^{13}\text{C}$  NMR (125.8 MHz, 298 K, benzene- $d_6$ ):  $\delta$  158.45 (Ar-C), 145.43 (Ar-C), 13, 8.41 (Ar-C), 136.47 (Ar-C), 136.10 (Ar-C), 133.67 (Ar-C), 132.40 (Ar-C), 130.63 (Ar-C), 130.04 (Ar-C), 129.27 (Ar-C), 113.90 (Ar-C), 55.22 (t,  $^1J_{\text{C-H}} = 8.1$  Hz, Ti- $\text{CH}_3$ ), 28.01 ( $\text{PCH}(\text{CH}_3)_2$ ), 27.17 ( $\text{PCH}(\text{CH}_3)_2$ ), 21.61 (Ar- $\text{CH}_3$ ), 21.46 ( $\text{PCH}(\text{CH}_3)_2$ ), 21.26 ( $\text{PCH}(\text{CH}_3)_2$ ), 20.99 (Ar- $\text{CH}_3$ ), 20.66 (Ar- $\text{CH}_3$ ), 20.49 (Ar- $\text{CH}_3$ ).

### Synthesis of $(\text{PN})_2\text{Ti}=\text{CH}_2$ (**3**)

#### Route A:

To a dark green solution of complex **1** (224 mg, 0.3 mmol, 1 equiv.) in 5 mL of THF in a 20 mL vial was added a 5 mL slurry of  $[\text{FeCp}_2][\text{OTf}]$  (101.5mg, 0.3 mmol, 1 equiv.) at room temperature while stirring. A color change to a bright red color was observed immediately upon addition. The solution was stirred for another hour at room temperature during which no further color change was observed. All volatiles were taken to dryness under reduced pressure, and the residue redissolved in 5 mL toluene. To this solution was added a stoichiometric amount of  $\text{H}_2\text{CPh}_3$  (83.3 mg, 0.3 mmol, 1 equiv.) as a 5 mL toluene solution at room temperature while stirring. A rapid color change from bright red to light orange was observed. The solution was stirred for 5 minutes, and then taken to dryness under reduced pressure, followed by two triturations with *n*-hexanes. The orange residue was then dissolved in 8 mL of *n*-hexanes, and filtered over Celite to remove the colorless precipitate, presumably  $[\text{H}_3\text{CPh}_3][\text{OTf}]$ . The filtrate was quickly stored at -35 °C overnight without further concentration, resulting in the deposition of light orange crystals of complex **3** suitable for x-ray diffraction (168 mg, 0.22 mmol, 75% yield). In solution complex **3**

gradually decomposes so it is recommended that manipulation of such a species must be conducted rapidly while maintaining the solution cold.

**Route B:**

To a dark green stirred solution of complex **1** (75 mg, 0.1 mmol, 1 equiv.) in 5 mL of toluene in a 20 mL vial was added a 5 mL toluene solution of the aryl oxyl radical •OMes\* (Mes\* = 2,4,6-<sup>t</sup>Bu<sub>3</sub>C<sub>6</sub>H<sub>2</sub>), at room temperature. Within five minutes, the solution began to lighten to an orange color. The reaction does not fully convert to complex **3** as monitored by <sup>1</sup>H NMR spectroscopy. The optimized reaction time for conversion to **3** is 15 minutes at room temperature. After this time, the reaction mixture was then taken to dryness under reduced pressure, triturated with *n*-hexanes, and then redissolved in 10 mL *n*-hexanes. The solution was filtered over Celite and the filtrate stored at -35 °C overnight to yield orange crystals of complex **3** (35 mg, 0.05 mmol, 48% yield)

<sup>1</sup>H NMR (400 MHz, 298 K, benzene-*d*<sub>6</sub>): δ 11.82 ppm (t, J<sub>H-H</sub>=3.68 Hz, 2 H, Ti=CH<sub>2</sub>), 7.04 (s, 4 H, *meta*-ArH<sub>Mesityl</sub>), 6.85 (br, Δv<sub>1/2</sub> = 4.0 Hz, 2 H, *meta*-ArH<sub>Tolyl</sub>), (br, Δv<sub>1/2</sub> = 4.0 Hz, 2 H, *meta*-ArH<sub>Tolyl</sub>), 5.69 (dd, <sup>3</sup>J<sub>H-H</sub> = 4.1 Hz, 2 H, *ortho*-ArH<sub>Tolyl</sub>), 2.62 (sept, <sup>3</sup>J<sub>H-H</sub> = 6.6 Hz, 2 H, P-CH-CH<sub>3</sub>), 2.50 (s, 6 H, para-CH<sub>3</sub><sub>Tolyl</sub>), 2.20 (s, 6 H para-CH<sub>3</sub><sub>Mesityl</sub>), 2.08 (s, 12 H, ortho-CH<sub>3</sub><sub>Mesityl</sub>), 1.01 (m, 6 H, P-CH-CH<sub>3</sub>, coupling value not assignable), 0.79 (m, 6 H, P-CH-CH<sub>3</sub>, coupling value not assignable due to overlapping residual solvent residues), 0.53 (sept, <sup>3</sup>J<sub>H-H</sub> = 6.4 Hz, 2 H, P-CH-CH<sub>3</sub>). <sup>31</sup>P{<sup>1</sup>H} NMR (162 MHz, 298 K, benzene-*d*<sub>6</sub>): δ 23.60 ppm. <sup>13</sup>C NMR (125.8 MHz, 298 K, toluene-*d*<sub>8</sub>): δ 291.10 (t, <sup>1</sup>J<sub>C-H</sub>=123.5 Hz, <sup>2</sup>J<sub>C-P</sub>=12.5 Hz, Ti=CH<sub>2</sub>), 170.32 (Ar-C), 159.67 (t, Ar-C, <sup>2</sup>J<sub>CP</sub>= 12.3 Hz), 158.17 (Ar-C), 145.46 (Ar-C), 136.85 (Ar-C), 133.78 (Ar-C), 133.60 (Ar-C), 131.82 (Ar-C), 130.27 (Ar-C), 129.89 (Ar-C), 112.78 (Ar-C), 112.12 (t, Ar-C, <sup>2</sup>J<sub>C-P</sub>= 4.2 Hz), 22.47 (PCH(CH<sub>3</sub>)<sub>2</sub>, CP coupling constant not assignable due to overlapping resonances), 21.67 (PCH(CH<sub>3</sub>)<sub>2</sub>, 20.86 (PCH(CH<sub>3</sub>)<sub>2</sub>), 20.65 (PCH(CH<sub>3</sub>)<sub>2</sub>), 20.28 (Ar-CH<sub>3</sub>), 19.97 (Ar-CH<sub>3</sub>), 19.21 (Ar-CH<sub>3</sub>).

**NMR Spectral Data**

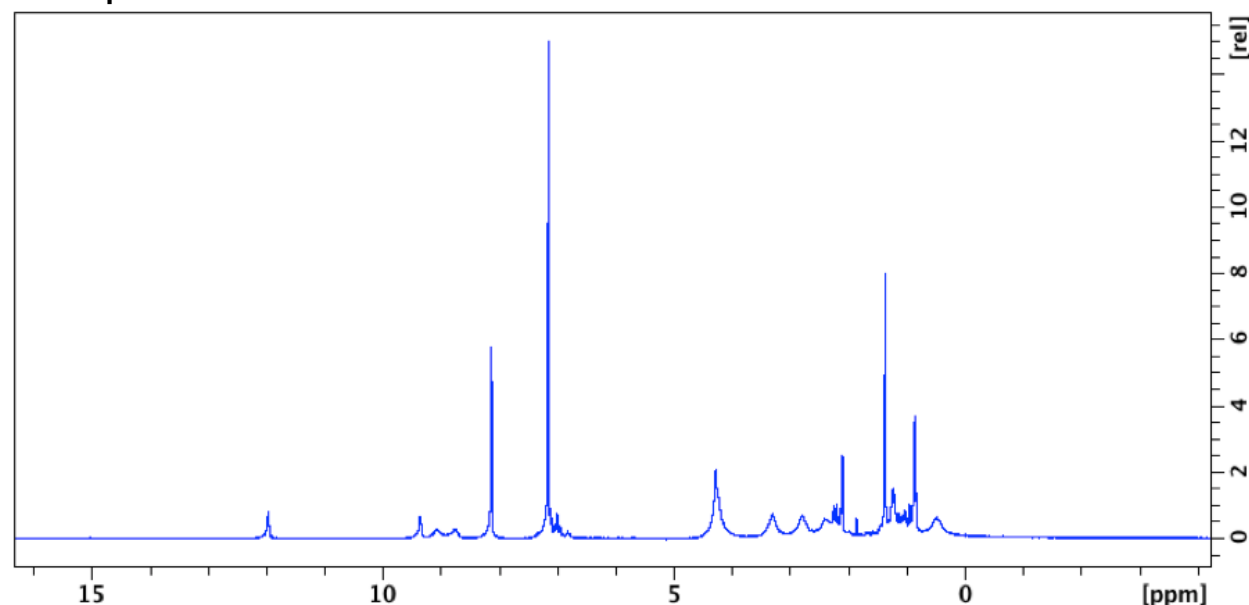

**Figure S1:** <sup>1</sup>H NMR Spectrum of **1** in C<sub>6</sub>D<sub>6</sub>, 400 MHz, 298 K

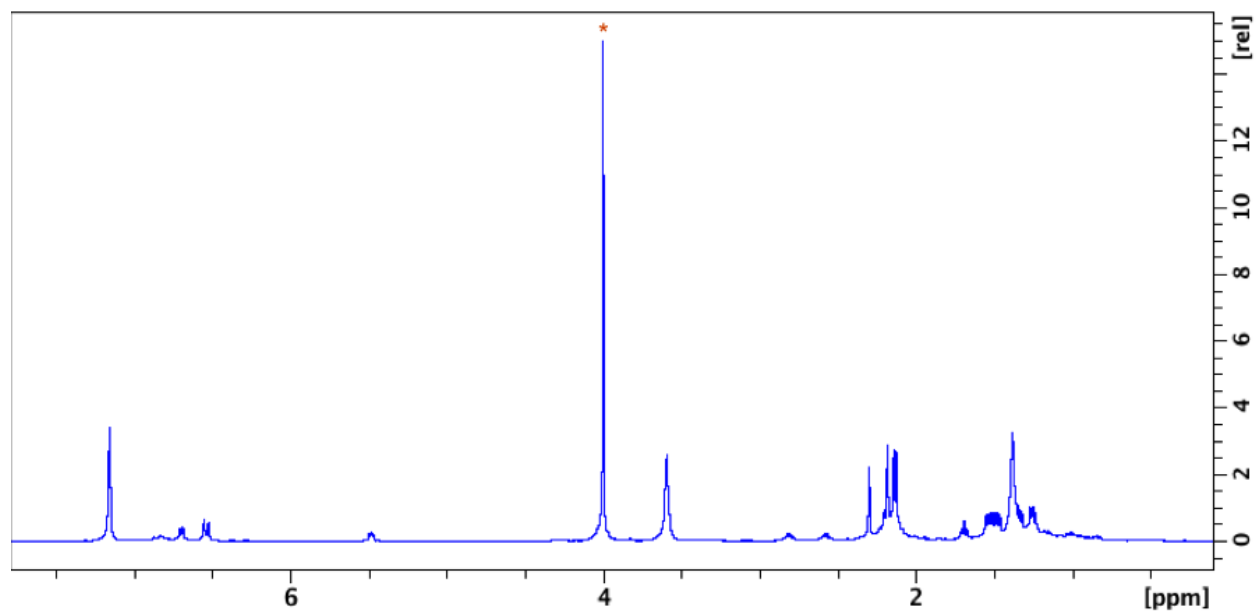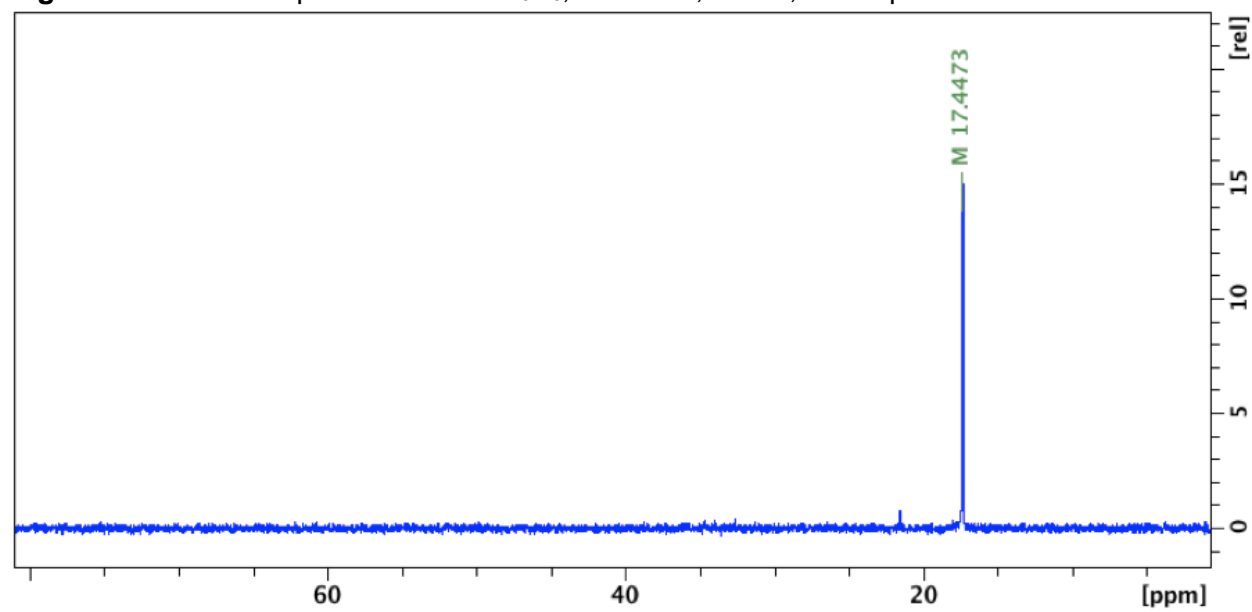

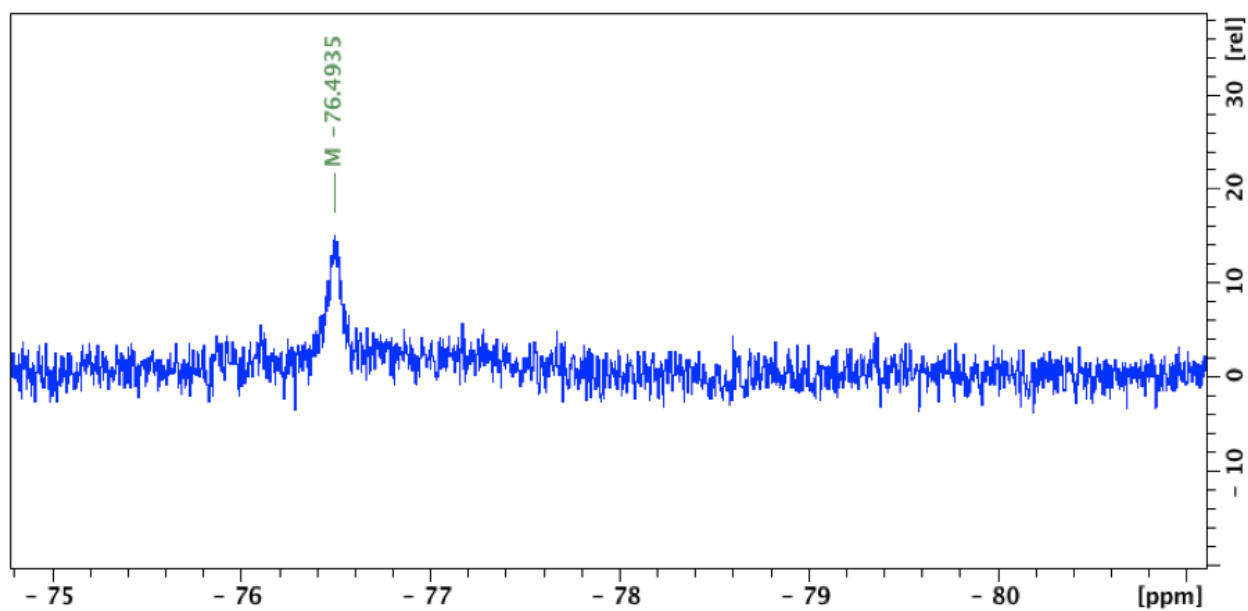

**Figure S4:**  $^{19}\text{F}$  NMR Spectrum of **2** in  $\text{C}_6\text{D}_6$ , 282 MHz, 298 K

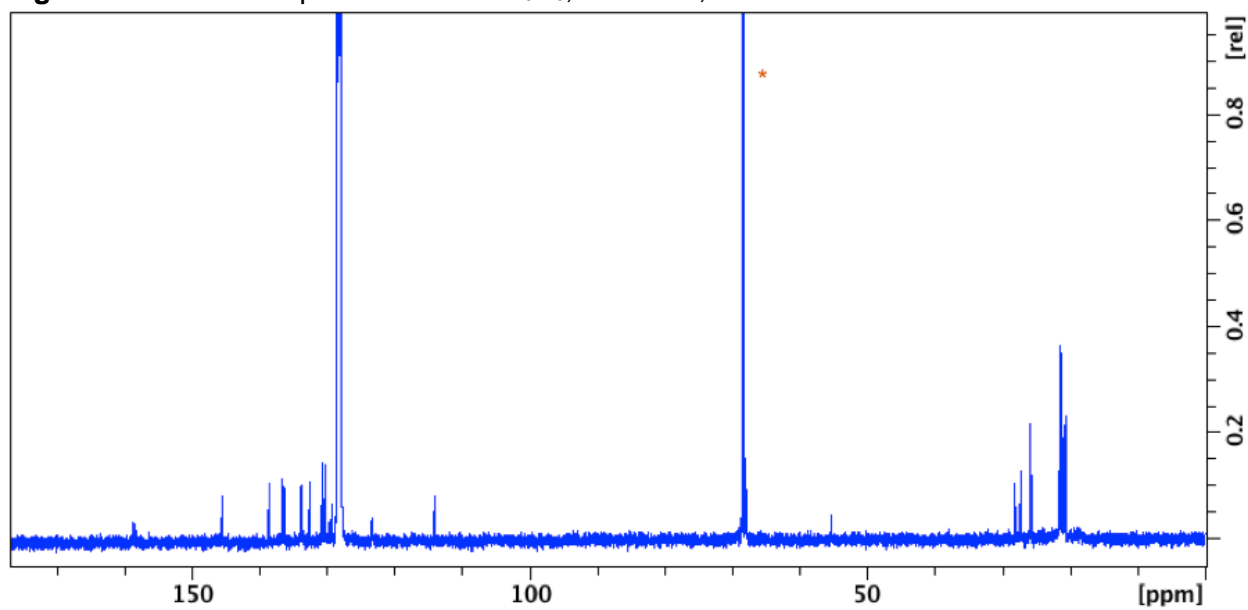

**Figure S5:**  $^{13}\text{C}\{^1\text{H}\}$  NMR Spectrum of **2** in  $\text{C}_6\text{D}_6$ , 125.8 MHz, 298 K, \*= $\text{FeCp}_2$

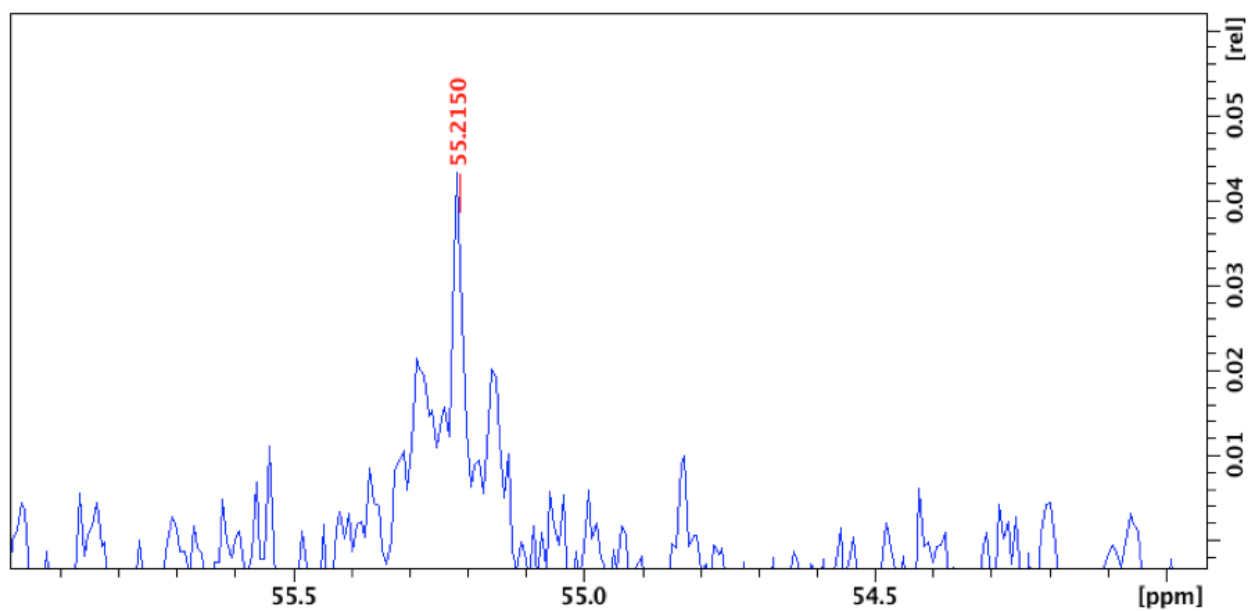

**Figure S6:**  $^{13}\text{C}\{^1\text{H}\}$  NMR Spectrum of **2** in  $\text{C}_6\text{D}_6$ , 125.8 MHz, 298K, feature of Ti-CH<sub>3</sub> resonance

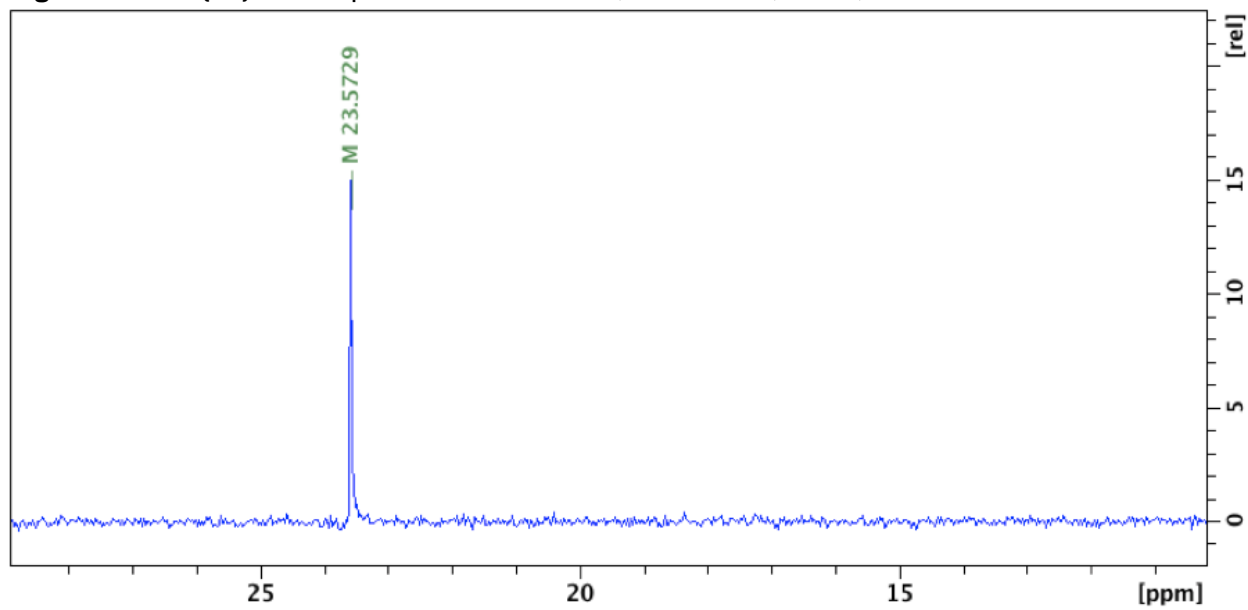

**Figure S7:**  $^{31}\text{P}\{^1\text{H}\}$  NMR Spectrum of **3** in  $\text{C}_6\text{D}_6$ , 162 MHz, 298 K

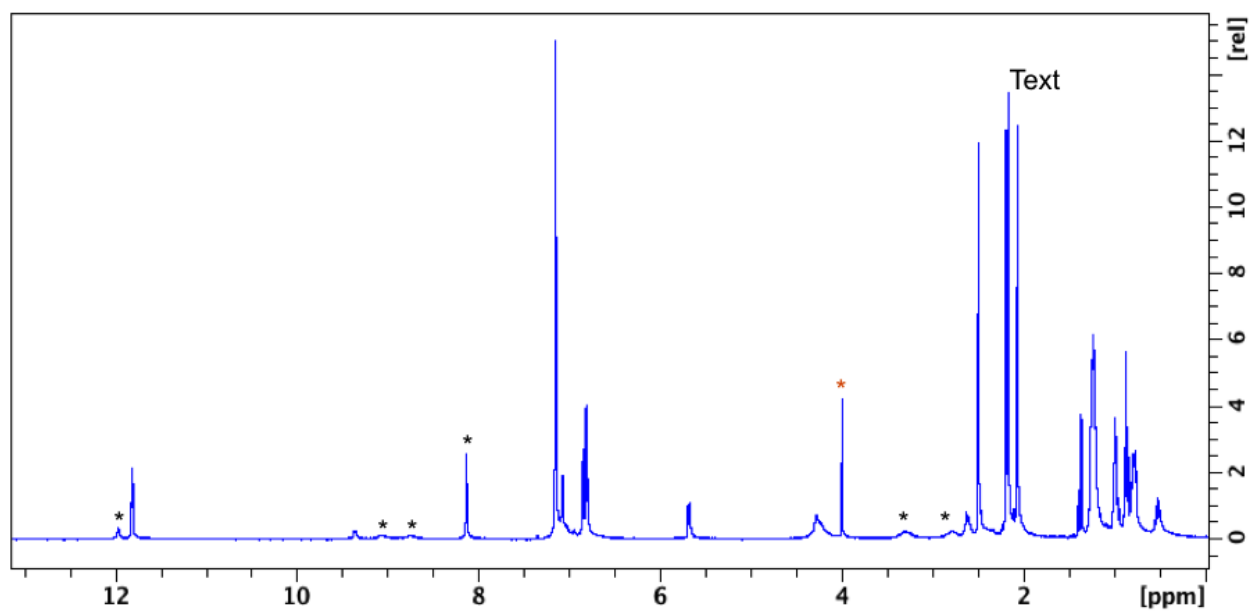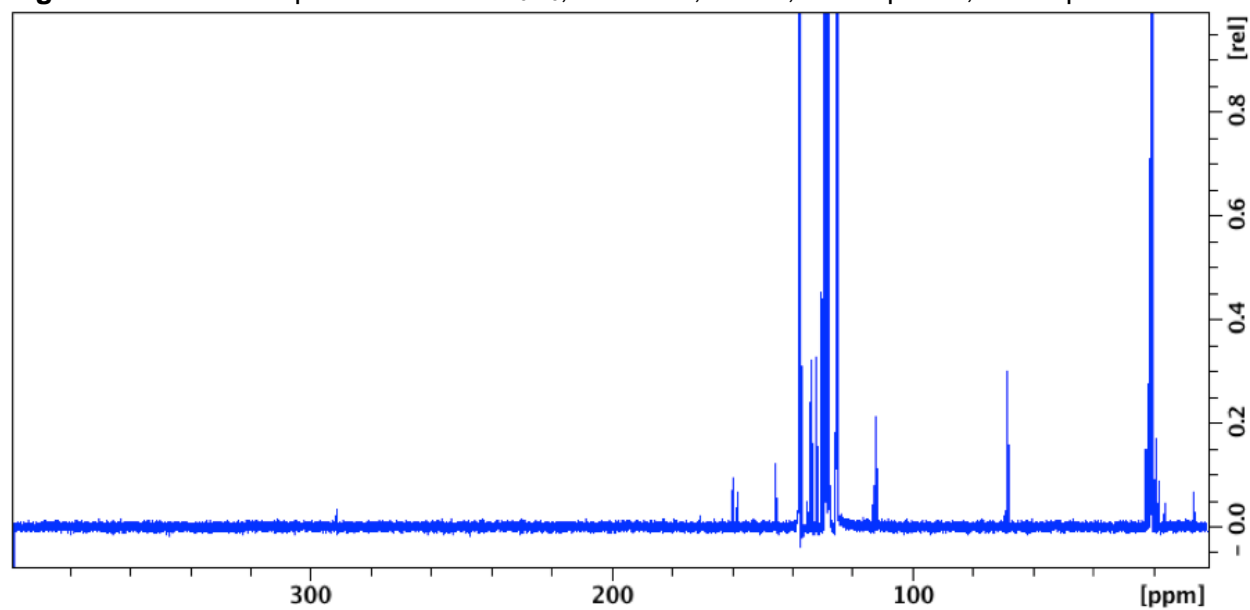

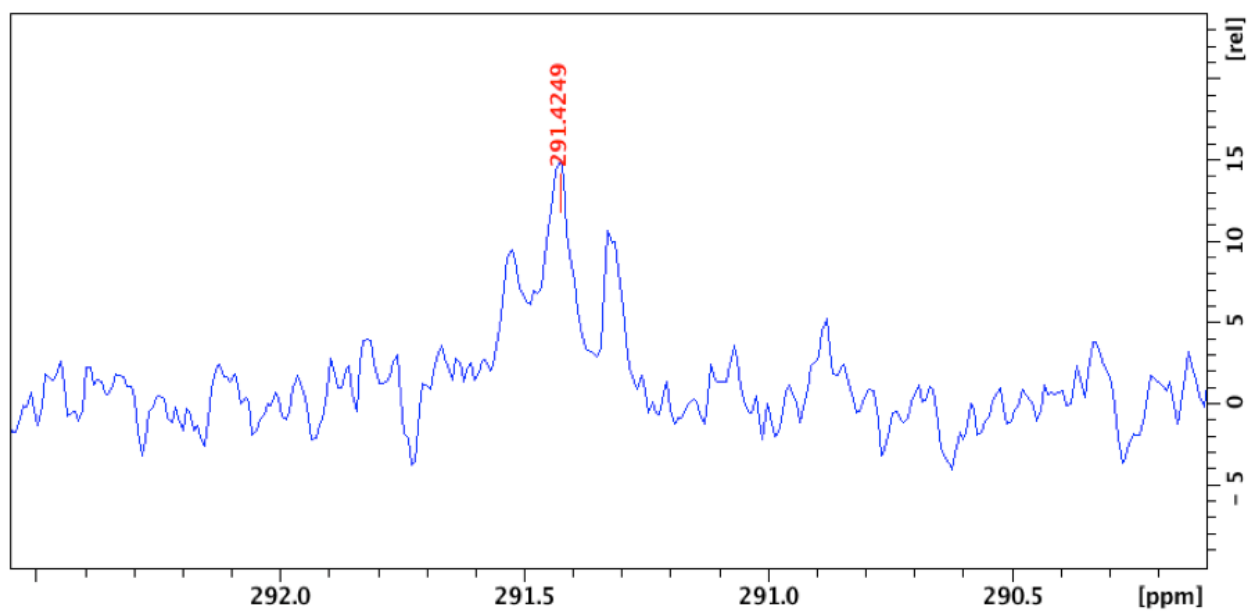

**Figure S10:**  $^{31}\text{P}$  coupled  $^{13}\text{C}\{^1\text{H}\}$  NMR Spectrum of **3** in  $\text{C}_7\text{D}_8$ , 125.8 MHz, 298 K, feature of  $\text{Ti}=\text{CH}_2$

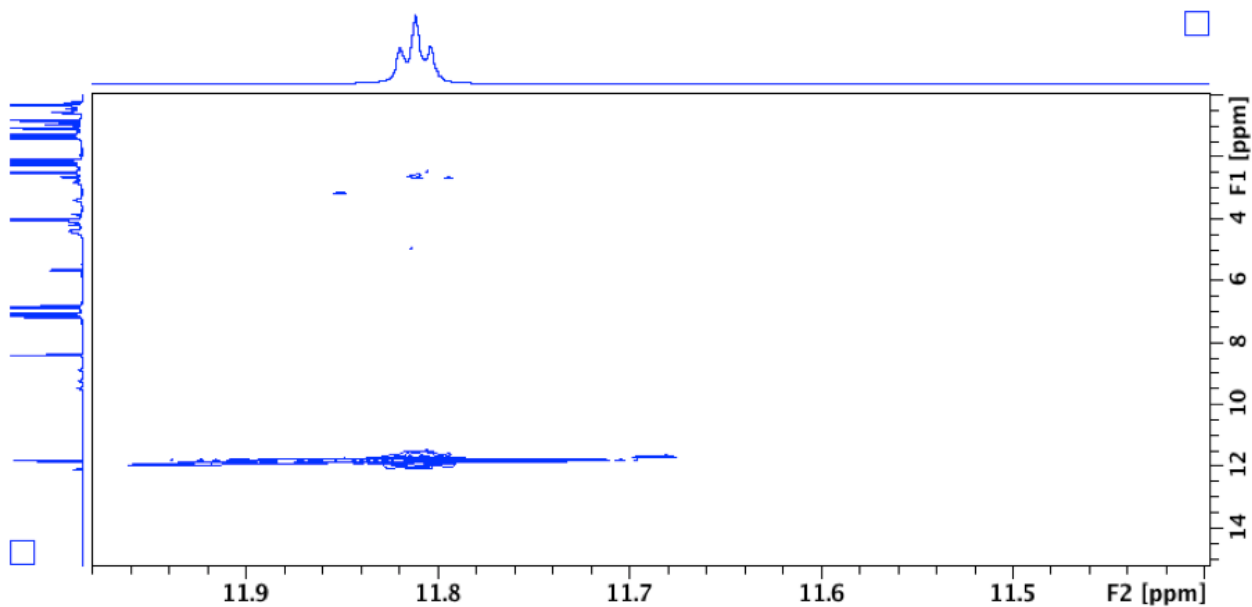

**Figure S11:**  $^{31}\text{P}$  and  $^1\text{H}$  coupled  $^{13}\text{C}$  NMR Spectrum of **3** in  $\text{C}_7\text{D}_8$ , 125.8 MHz, 298 K, feature of  $\text{Ti}=\text{CH}_2$

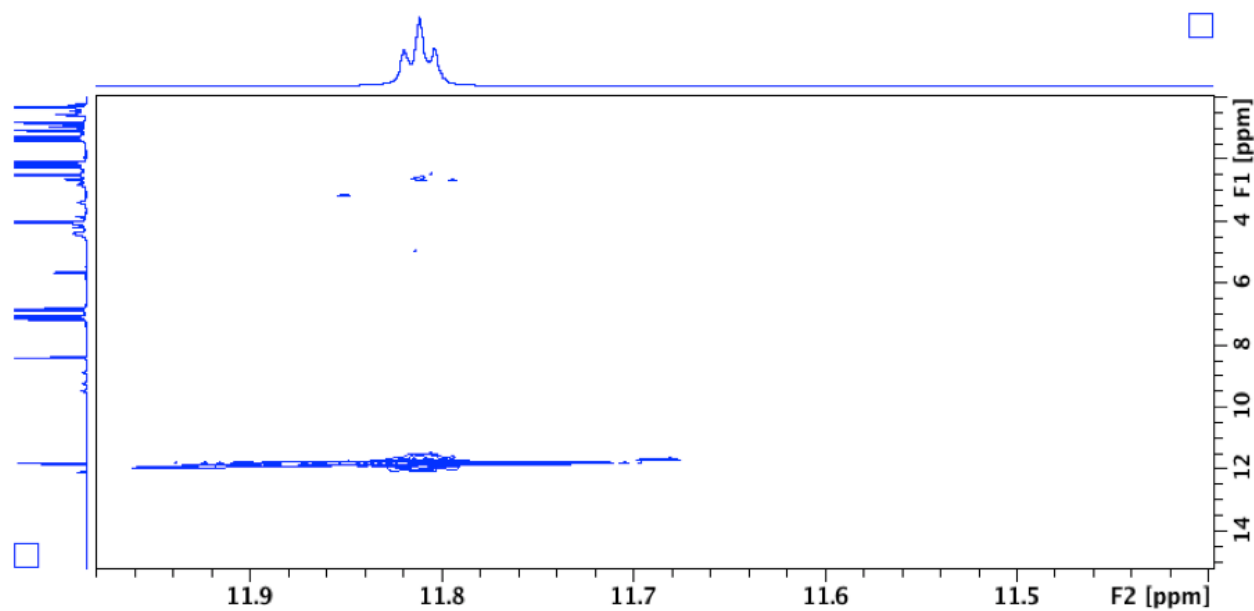

**Figure S12:**  $^1\text{H}$ - $^1\text{H}$  COSY NMR Spectrum of **3** in  $\text{C}_7\text{D}_8$ , 500 MHz, 298 K, feature of  $\text{Ti}=\text{CH}_2$

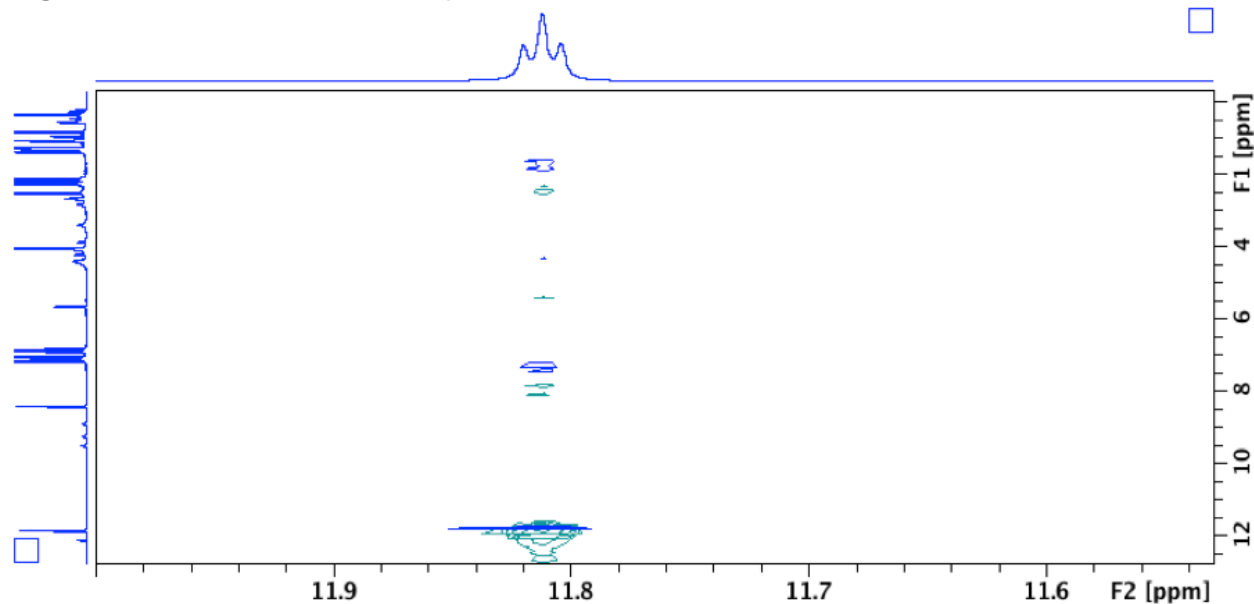

**Figure S13:**  $^1\text{H}$ - $^1\text{H}$  NOESY NMR Spectrum of **3** in  $\text{C}_7\text{D}_8$ , 500 MHz, 298 K, feature of  $\text{Ti}=\text{CH}_2$

## Molecular Structures and Crystallographic Tables

### X-ray Crystallography

Crystallographic data for are summarized Table S1 and S2. Suitable single crystals for X-ray analysis of **1** or **3** were placed on the end of a Cryoloop coated in NVH oil. The X-ray intensity data collection was carried out on a Bruker APEXII CCD area detector using graphite-monochromated Mo-K radiation ( $\lambda = 0.71073 \text{ \AA}$ ) at 100(1) K. Preliminary indexing was performed from a series of thirty-six  $0.5^\circ$  rotation frames with exposures of 10 seconds. Rotation frames were integrated using SAINT,<sup>[7]</sup> producing a listing of non-averaged  $R^2$  and  $s(R^2)$  values which

were then passed to the SHELXTL<sup>[8]</sup> program package for further processing and structure solution. The intensity data were corrected for Lorentz and polarization effects and for absorption using SADABS.<sup>[9]</sup> All calculations were performed using SHELXS<sup>[10]</sup> and SHELXL.<sup>[11]</sup> The structures were solved by Patterson and Fourier transform methods. All reflections were used during refinement. Non-hydrogen atoms were refined anisotropically and hydrogen atoms were refined using riding models with exception for methyldiene of **3**.

**Table S1. Crystallographic Data for Complex 1**

|                                    |                                             |
|------------------------------------|---------------------------------------------|
| Molecular formula                  | C100 H154 N4 P4 Ti2                         |
| Formula weight                     | 815.98                                      |
| Temperature (K)                    | 100(2)                                      |
| Crystal system                     | Triclinic                                   |
| Space group                        | P                                           |
| Cell constants:                    |                                             |
| a (Å)                              | 12.3342(3)                                  |
| b (Å)                              | 14.2207(4)                                  |
| c (Å)                              | 28.9433(8)                                  |
| Volume (Å <sup>3</sup> )           | 4833.9(2)                                   |
| Z                                  | 4                                           |
| Density (calcd mg/m <sup>3</sup> ) | 1.121                                       |
| Abs coeff (mm <sup>-1</sup> )      | 0.277                                       |
| F(000)                             | 1772                                        |
| Wavelength                         | 0.71073                                     |
| q range for data collection (°)    | 1.43 to 27.56                               |
| # Reflns collected                 | 21616                                       |
| Refinement method                  | Full-matrix least-squares on F <sup>2</sup> |
| $R_i^a$                            | 0.0814                                      |
| $wR_2^b$                           | 0.0575                                      |

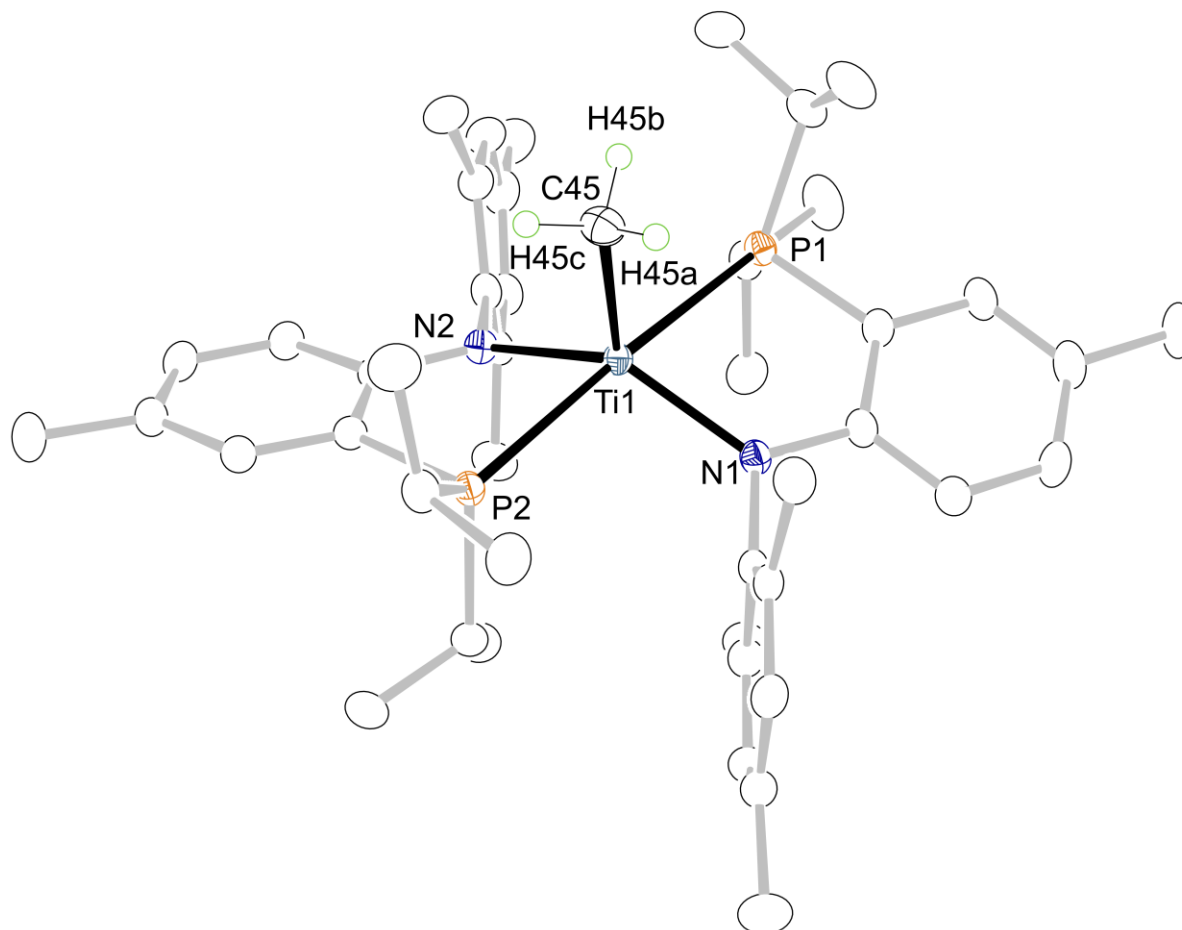

**Figure S14.** Molecular structure of **1**, showing thermal ellipsoids at 50% probability level. H-atoms, with the exception of those on C45, have been omitted for clarity.

**Table S2. Crystallographic Data for 2**

| Molecular formula | C45 H64 N2 P2 Ti |
|-------------------|------------------|
| Formula weight    | 742.82           |
| Temperature (K)   | 100(2)           |
| Crystal system    | Monoclinic       |

|                                    |                                             |
|------------------------------------|---------------------------------------------|
| Space group                        | C 1 2/c 1                                   |
| Cell constants:                    |                                             |
| a (Å)                              | 15.3286(7)                                  |
| b (Å)                              | 12.3358(5)                                  |
| c (Å)                              | 22.4869(11)                                 |
| Volume (Å <sup>3</sup> )           | 4230.8(3)                                   |
| Z                                  | 4                                           |
| Density (calcd mg/m <sup>3</sup> ) | 1.166                                       |
| Abs coeff (mm <sup>-1</sup> )      | 0.310                                       |
| F(000)                             | 1600                                        |
| Wavelength                         | 0.71073                                     |
| q range for data collection (°)    | 1.43 to 27.56                               |
| # Reflns collected                 | 59618                                       |
| Refinement method                  | Full-matrix least-squares on F <sup>2</sup> |
| $R_1^a$                            | 0.0484                                      |
| $wR_2^b$                           | 0.0374                                      |
| Goodness-of-fit on $F2c$           | 1.058                                       |

---

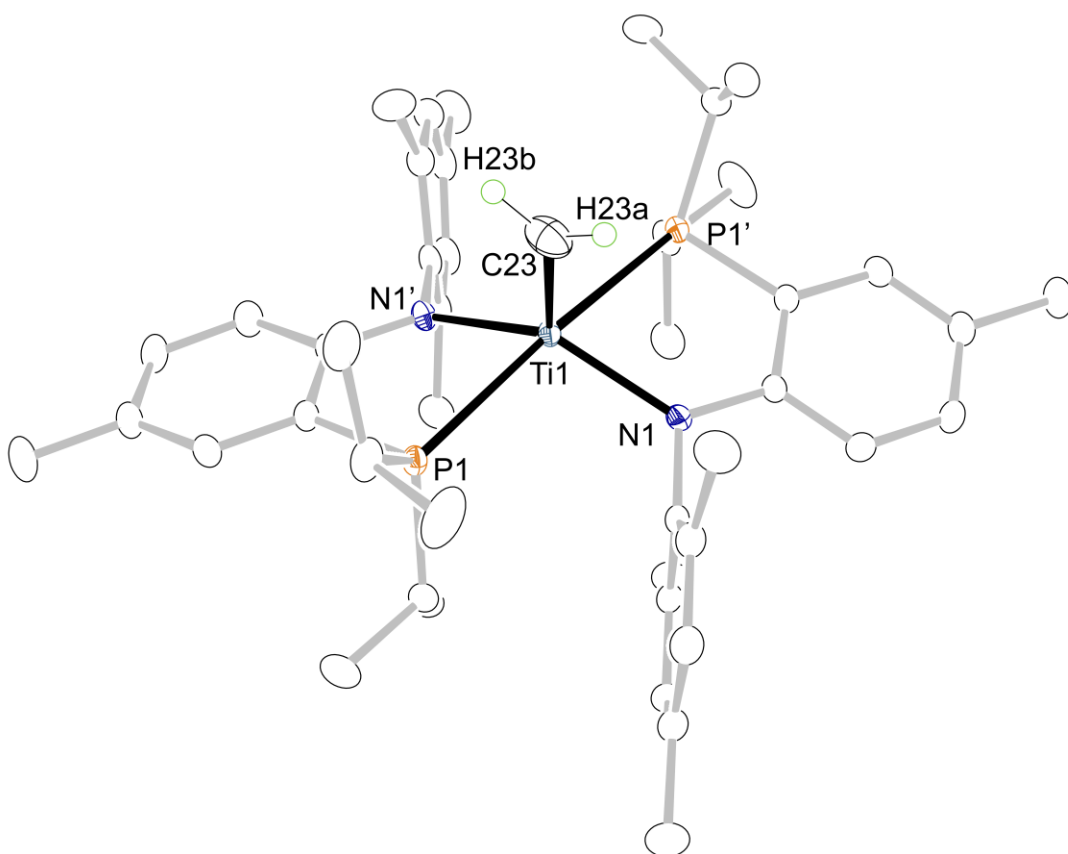

**Figure**  
**S15.** Molecular structure of **1**, showing thermal ellipsoids at 50% probability level. H-atoms, with the exception of those on C23, have been omitted for clarity.

## Computational Details

All calculation results were obtained using density functional theory<sup>[12]</sup> as implemented in the Jaguar 9.1 suite<sup>[13]</sup> of ab initio quantum chemistry programs. The geometry optimizations were carried out with B3LYP<sup>[14–17]</sup> functional and 6-31G\*\* basis set. Titanium was represented using the Los Alamos LACVP basis set<sup>[18–20]</sup> that includes effective core potentials. The energies of the optimized structures were readdressed by single-point calculations using cc-pVTZ(-f)<sup>[21]</sup> basis set. Titanium used a modified version of LACVP denoted LACV3P. Vibrational frequency calculations were carried out at the B3LYP/6-31G\*\* level of theory. Standard approximation was used to obtain zero-point vibrational energy and entropy corrections. Solvation energies were evaluated by Self-Consistent Reaction field (SCRF)<sup>[22–24]</sup> calculations with the dielectric constant  $\epsilon = 4.3$  (Ethyl Ether) using the optimized gas phase structures. The natural bond orbital (NBO) analysis was carried out using NBO 6.0 program<sup>[25–27]</sup> in the Jaguar 9.1 suite. The Gibbs free energy in solution phase was computed as follows<sup>[28]</sup>:

$$G(\text{Sol}) = G(\text{gas}) + G^{\text{solv}} \quad (1)$$

$$G(\text{gas}) = H(\text{gas}) - TS(\text{gas}) \quad (2)$$

$$H(\text{gas}) = E(\text{SCF}) + ZPE \quad (3)$$

$$\Delta G(\text{Sol}) = \sum G(\text{Sol}) \text{ for products} - \sum G(\text{Sol}) \text{ for reactants} \quad (4)$$

## Cartesian Coordinates of All Computed Structures

### 3-Singlet

|    |              |             |              |
|----|--------------|-------------|--------------|
| Ti | 5.980214569  | 8.332128337 | 16.777293945 |
| P  | 7.322321404  | 8.476039008 | 19.143521281 |
| N  | 7.864935571  | 9.004241905 | 16.235341647 |
| C  | 9.032774882  | 8.939102894 | 17.012150513 |
| C  | 10.322553043 | 9.179381453 | 16.470400700 |
| H  | 10.417693252 | 9.454431158 | 15.426887182 |
| C  | 11.474310358 | 9.060399601 | 17.235856107 |
| H  | 12.436221248 | 9.249990767 | 16.762109745 |
| C  | 11.432019652 | 8.697293442 | 18.588458309 |
| C  | 10.166040211 | 8.490615086 | 19.137090366 |
| H  | 10.104042589 | 8.216342066 | 20.186561691 |
| C  | 8.981307752  | 8.623147333 | 18.395563386 |
| C  | 12.693775256 | 8.553691612 | 19.407373965 |
| H  | 13.382380227 | 7.822731301 | 18.965854055 |
| H  | 12.472286072 | 8.223483924 | 20.427110657 |
| H  | 13.240570926 | 9.502526277 | 19.479945536 |
| C  | 7.537446559  | 7.030357960 | 20.343671006 |
| H  | 8.395528358  | 7.314689515 | 20.963988049 |
| C  | 7.895351703  | 5.728657673 | 19.614190318 |
| H  | 7.082867751  | 5.412607557 | 18.953921862 |
| H  | 8.073718740  | 4.932391147 | 20.347457505 |
| H  | 8.798742040  | 5.839046709 | 19.007914869 |
| C  | 6.333907825  | 6.830106411 | 21.275570765 |
| H  | 5.469604252  | 6.453004327 | 20.725455150 |
| H  | 6.030959814  | 7.748520449 | 21.786103815 |
| H  | 6.585593587  | 6.089146803 | 22.044450051 |

C 7.192325833 9.986208244 20.290280708  
 H 6.145009239 9.976556819 20.611877501  
 C 7.431671475 11.270875893 19.482846298  
 H 8.473222992 11.337905390 19.151902913  
 H 7.217390371 12.149056222 20.103841099  
 H 6.793156255 11.326323040 18.599576778  
 C 8.091443873 9.979056157 21.536420184  
 H 9.151669300 9.998990472 21.265191679  
 H 7.918451674 9.118137961 22.187714780  
 H 7.892709874 10.880265376 22.130318297  
 C 8.087500669 9.460626362 14.889372076  
 C 8.458955405 8.549638424 13.874819028  
 C 8.700582092 9.026240210 12.579270376  
 H 8.986949433 8.314275244 11.807304823  
 C 8.609659155 10.381832046 12.254274785  
 C 8.290794740 11.274867437 13.283072702  
 H 8.248197231 12.341487988 13.067928618  
 C 8.045775076 10.844301548 14.590720478  
 C 8.688848777 7.091171543 14.191172997  
 H 8.918096212 6.527554881 13.282022703  
 H 7.822456768 6.636720067 14.677171645  
 H 9.533351278 6.975570592 14.880588099  
 C 8.862585725 10.876834809 10.848259767  
 H 9.224743489 10.073515190 10.199960435  
 H 9.608011660 11.680602267 10.834481601  
 H 7.949257812 11.281717357 10.394769362  
 C 7.825143411 11.867043025 15.678598047  
 H 7.669653736 12.863610357 15.255143318  
 H 8.693233914 11.915029282 16.346911092  
 H 6.966434031 11.621969889 16.307115594

|   |              |             |              |
|---|--------------|-------------|--------------|
| C | 5.973961148  | 6.463837612 | 16.773514302 |
| H | 6.847495100  | 5.846112026 | 16.536271895 |
| H | 5.094507307  | 5.853055745 | 17.006931233 |
| P | 4.636790350  | 8.481908776 | 14.413335255 |
| N | 4.097725237  | 9.007996437 | 17.322914477 |
| C | 2.928709523  | 8.941275522 | 16.547578542 |
| C | 1.639219045  | 9.176496205 | 17.092291460 |
| H | 1.545138921  | 9.446120926 | 18.137362782 |
| C | 0.486873014  | 9.060310070 | 16.327193844 |
| H | -0.474660710 | 9.247493641 | 16.802538159 |
| C | 0.528110430  | 8.703897144 | 14.972759206 |
| C | 1.793468589  | 8.497794567 | 14.422490257 |
| H | 1.854918237  | 8.226660946 | 13.372102762 |
| C | 2.978823747  | 8.628100759 | 15.163242929 |
| C | -0.734250292 | 8.565447032 | 14.154020269 |
| H | -1.422942382 | 7.832389480 | 14.591850928 |
| H | -0.513730694 | 8.241022203 | 13.132240708 |
| H | -1.280548151 | 9.514974797 | 14.087294721 |
| C | 4.426090604  | 7.036800743 | 13.213406790 |
| H | 3.571814547  | 7.321248008 | 12.587635473 |
| C | 4.064349327  | 5.734752171 | 13.939080811 |
| H | 4.875271001  | 5.415948257 | 14.599753679 |
| H | 3.885899074  | 4.940757200 | 13.203484065 |
| H | 3.159983679  | 5.845464823 | 14.543694779 |
| C | 5.637379018  | 6.838547744 | 12.290812579 |
| H | 6.499677372  | 6.467929309 | 12.849064755 |
| H | 5.939662763  | 7.756581735 | 11.779256608 |
| H | 5.395118011  | 6.093473385 | 11.522819323 |
| C | 4.763701022  | 9.989276588 | 13.262450419 |
| H | 5.809799147  | 9.978119957 | 12.937323213 |

|   |             |              |              |
|---|-------------|--------------|--------------|
| C | 4.528508421 | 11.276465059 | 14.066439012 |
| H | 3.487413340 | 11.347565033 | 14.397788494 |
| H | 4.745172379 | 12.152361278 | 13.443052289 |
| H | 5.167276682 | 11.332064396 | 14.949280432 |
| C | 3.860195114 | 9.980109059  | 12.019467774 |
| H | 2.800662126 | 9.999121304  | 12.293831084 |
| H | 4.032201337 | 9.119023464  | 11.368140113 |
| H | 4.055961518 | 10.881160661 | 11.424279850 |
| C | 3.877955806 | 9.466713628  | 18.669031515 |
| C | 3.530930398 | 8.552125745  | 19.688691211 |
| C | 3.301362534 | 9.026625379  | 20.987412400 |
| H | 3.038860373 | 8.311404386  | 21.764805462 |
| C | 3.372867588 | 10.384289743 | 21.308283321 |
| C | 3.661318662 | 11.280849169 | 20.273523185 |
| H | 3.685811700 | 12.348606551 | 20.485736675 |
| C | 3.899502225 | 10.851931003 | 18.964242155 |
| C | 3.311362893 | 7.091735074  | 19.373950358 |
| H | 3.091735393 | 6.526532177  | 20.284477460 |
| H | 4.177885103 | 6.643810362  | 18.882345265 |
| H | 2.463527001 | 6.970011471  | 18.689684272 |
| C | 3.132235369 | 10.878012400 | 22.716892020 |
| H | 2.798366140 | 10.069130622 | 23.373394169 |
| H | 2.369785575 | 11.665415723 | 22.740628130 |
| H | 4.043800331 | 11.304304515 | 23.154029411 |
| C | 4.092947723 | 11.876246481 | 17.873007660 |
| H | 4.228908599 | 12.876931603 | 18.293454355 |
| H | 3.221236412 | 11.903885875 | 17.208262810 |
| H | 4.954452985 | 11.648113343 | 17.241886990 |

=====

3-Triplet

```

=====
Ti  5.979923075  8.347975707  16.781701496
P   7.361715533  8.344074649  19.146039188
N   7.863009345  9.099189036  16.271993068
C   9.030572117  9.054919196  17.050808957
C   10.308607840  9.394090209  16.528532963
H   10.386280268  9.739664447  15.504511532
C   11.469068273  9.281996833  17.282557133
H   12.418661594  9.549242344  16.821542171
C   11.449658861  8.828659210  18.609120153
C   10.197120844  8.523028490  19.142775377
H   10.151564563  8.175266656  20.172036476
C   9.004291350  8.640097531  18.411502557
C   12.719234852  8.691350165  19.417134897
H   13.436617021  8.015275682  18.935172340
H   12.514854131  8.295049665  20.416979074
H   13.227043731  9.656201498  19.543465994
C   7.623641303  6.844866601  20.263304476
H   8.414902441  7.138881241  20.963423056
C   8.121802202  5.624494383  19.477740574
H   7.365816427  5.280037668  18.765007416
H   8.332854875  4.799597039  20.169374760
H   9.037553437  5.844208823  18.922445610
C   6.367732311  6.502193879  21.078676900
H   5.571527284  6.125801988  20.431023233
H   5.970765472  7.359795645  21.630068992
H   6.601874211  5.716034377  21.807202384
C   7.136556053  9.785792757  20.362663040
H   6.075384285  9.742044636  20.628465662
C   7.395870202  11.113829957  19.635111269

```

H 8.456941670 11.225830097 19.391251707  
H 7.101481372 11.952251153 20.276976430  
H 6.827419964 11.195146611 18.706279280  
C 7.972381505 9.722015548 21.650114871  
H 9.045627153 9.751291474 21.435338275  
H 7.765289859 8.833733460 22.253477698  
H 7.743417179 10.596748648 22.272118060  
C 8.081528736 9.553972037 14.927692969  
C 8.448988387 8.641184474 13.912017249  
C 8.655962251 9.107891794 12.607501870  
H 8.937517240 8.392964596 11.836026543  
C 8.541274544 10.460169337 12.274056010  
C 8.229346129 11.356568026 13.301582763  
H 8.169105073 12.421011140 13.079154662  
C 8.013247448 10.933633792 14.617116055  
C 8.705055496 7.190317399 14.238078849  
H 8.934550842 6.620991603 13.332379570  
H 7.848960570 6.726677457 14.734039644  
H 9.554878325 7.092460031 14.923901271  
C 8.759430438 10.946218142 10.859233429  
H 9.148413123 10.149552046 10.217930044  
H 9.471088623 11.779569278 10.826949482  
H 7.825978422 11.306871517 10.408837055  
C 7.790537026 11.959913857 15.701484260  
H 7.628943640 12.954363325 15.275049906  
H 8.658887838 12.014429912 16.369409881  
H 6.933078498 11.712959629 16.332189297  
C 5.971236813 6.291339122 16.784440355  
H 6.809227224 5.658721703 16.469002081  
H 5.126653648 5.668643720 17.102468510

|   |              |              |              |
|---|--------------|--------------|--------------|
| P | 4.598834988  | 8.345357052  | 14.418664412 |
| N | 4.100469430  | 9.113102301  | 17.286165684 |
| C | 2.930552567  | 9.058492753  | 16.510990523 |
| C | 1.652172240  | 9.397244355  | 17.032834360 |
| H | 1.575429081  | 9.751908058  | 18.053886381 |
| C | 0.490135858  | 9.272967348  | 16.282482085 |
| H | -0.459345292 | 9.539354811  | 16.744280429 |
| C | 0.507362226  | 8.808869490  | 14.959361563 |
| C | 1.760889958  | 8.505914209  | 14.425413253 |
| H | 1.806368716  | 8.151514210  | 13.398410154 |
| C | 2.954967866  | 8.633843248  | 15.153237204 |
| C | -0.763938302 | 8.655505362  | 14.157296577 |
| H | -1.468256511 | 7.966385729  | 14.640195150 |
| H | -0.558548893 | 8.266198430  | 13.154922924 |
| H | -1.287204443 | 9.612845206  | 14.037631367 |
| C | 4.343982908  | 6.852892842  | 13.291354628 |
| H | 3.525275127  | 7.133710714  | 12.617926570 |
| C | 3.902302922  | 5.611236021  | 14.077596093 |
| H | 4.687908220  | 5.280550673  | 14.764485904 |
| H | 3.693568204  | 4.787670715  | 13.383696917 |
| H | 2.997791683  | 5.800146836  | 14.661886881 |
| C | 5.582787655  | 6.553738008  | 12.434025060 |
| H | 6.410321238  | 6.195787584  | 13.052008567 |
| H | 5.936155300  | 7.427246751  | 11.877980712 |
| H | 5.348014694  | 5.767064363  | 11.706243189 |
| C | 4.817700850  | 9.794284061  | 13.210710444 |
| H | 5.877077436  | 9.750114383  | 12.937995125 |
| C | 4.565349632  | 11.118381566 | 13.947552849 |
| H | 3.506765949  | 11.228089755 | 14.203266266 |
| H | 4.851525083  | 11.960658320 | 13.306938376 |

|   |             |              |              |
|---|-------------|--------------|--------------|
| H | 5.143842976 | 11.195319744 | 14.870273431 |
| C | 3.972302503 | 9.738199513  | 11.929485814 |
| H | 2.900943629 | 9.764374671  | 12.153881690 |
| H | 4.175676249 | 8.853970212  | 11.318826959 |
| H | 4.195279589 | 10.617222887 | 11.311409484 |
| C | 3.884434317 | 9.572138129  | 18.629234174 |
| C | 3.512925805 | 8.661598864  | 19.645244482 |
| C | 3.300347424 | 9.130591486  | 20.947839807 |
| H | 3.013850757 | 8.417228605  | 21.718955696 |
| C | 3.416111465 | 10.483091756 | 21.279696737 |
| C | 3.738198635 | 11.377006162 | 20.252922756 |
| H | 3.801717467 | 12.441328089 | 20.475048329 |
| C | 3.960942498 | 10.952156798 | 18.938755324 |
| C | 3.260234167 | 7.209392126  | 19.321994604 |
| H | 3.041456749 | 6.639401888  | 20.229867016 |
| H | 4.114336002 | 6.749647237  | 18.818809015 |
| H | 2.404952268 | 7.107003616  | 18.643645766 |
| C | 3.190214466 | 10.970639983 | 22.692839035 |
| H | 2.796533281 | 10.174684239 | 23.332195768 |
| H | 2.479285775 | 11.804750169 | 22.720761092 |
| H | 4.121410370 | 11.330209632 | 23.148722509 |
| C | 4.196786466 | 11.975655518 | 17.854812391 |
| H | 4.330461565 | 12.974747855 | 18.280234512 |
| H | 3.347094370 | 12.012171860 | 17.162398715 |
| H | 5.076235388 | 11.740510047 | 17.250170175 |

## References

- [1] D.F. Evans, *J. Chem. Soc. (Resumed)*, 1959, 2003.
- [2] G. A. Bain and J. F. Berry, *J. Chem. Ed.*, 2008, **85**, 532.
- [3] M. E. Carroll, B. Pinter, P. J. Carroll and D. J. Mindiola, *J. Am. Chem. Soc.*, 2015, **137**, 8884.
- [4] V. W. Manner, T. F. Markle, J. H. Freudenthal, J. P. Roth and J. M. Mayer, *Chem. Commun.*, 2008, 256.
- [5] D. D. Heinrich, R. J. Staples and J. P. Fackler Jr., *Inorg. Chim. Acta*, 1995, **229**, 61.
- [6] J. J. Curley, R. G. Bergman and T. D. Tilley, *Dalton Trans.*, 2012, **41**, 192.
- [7] SAINT; Bruker AXS Inc.: Madison, WI, USA. 2009.
- [8] SHELXTL; Bruker AXS Inc.: Madison, WI, USA, 2009.
- [9] G. M. Sheldrick, SADABS; University of Gottingen: Germany, 2007.
- [10] G. M. Sheldrick, *Acta Crystallogr.*, 2008, **A64**, 112.
- [11]  $R_1 = S||F_o| - |F_c|| / S |F_o|$ ,  $wR_2 = [Sw(F_o^2 - F_c^2)^2/Sw(F_o^2)^2]^{1/2}$ ,  $GOF = [Sw(F_o^2 - F_c^2)^2/(n - p)]^{1/2}$ ; where n = the number of reflections and p = the number of parameters refined.
- [12] R. G. Parr and W. Yang, *Density Functional Theory of Atoms and Molecules*. Oxford University Press: New York, 1989.
- [13] A. D. Bochevarov, E. Harder, T. F. Hughes, J. R. Greenwood, D. A. Braden, D. M. Philipp, D. Rinaldo, M. D. Halls, J. Zhang and R. A. Friesner, *Int. J. Quantum Chem.*, 2013, **113**, 2110.
- [14] A. D. Becke, *J. Chem. Phys.*, 1993, **98**, 5648.
- [15] C. T. Lee, W. T. Yang and R. G. Parr, *Phys. Rev. B*, 1988, **37**, 785.
- [16] A. D. Becke, *Phys. Rev. A*, 1988, **38**, 3098.
- [17] S. H. Vosko, L. Wilk and M. Nusair, *Can. J. Phys.*, 1980, **58**, 1200.
- [18] W. R. Wadt and P. J. Hay, *J. Chem. Phys.*, 1985, **82**, 284.
- [19] P. J. Hay and W. R. Wadt, *J. Chem. Phys.*, 1985, **82**, 270.
- [20] P. J. Hay and W. R. Wadt, *J. Chem. Phys.*, 1985, **82**, 299.
- [21] T. H. Dunning, Jr. *J. Chem. Phys.*, 1989, **90**, 1007.
- [22] B. Marten, K. Kim, C. Cortis, R. A. Friesner, R. B. Murphy, M. N. Ringnalda, D. Sitkoff and B. Honig, *J. Phys. Chem.*, 1996, **100**, 11775.
- [23] M. Friedrichs, R. H. Zhou, S. R. Edinger and R. A. Friesner, *J. Phys. Chem. B*, 1999, **103**, 3057.
- [24] S. R. Edinger, C. Cortis, P. S. Shenkin and R. A. Friesner, *J. Phys. Chem. B*, 1997, **101**, 1190.
- [25] J. P. Foster and F. Weinhold, *J. Am. Chem. Soc.*, 1980, **102**, 7211.
- [26] A. E. Reed, R. B. Weinstock and F. Weinhold, *J. Chem. Phys.*, 1985, **83**, 735.
- [27] A. E. Reed, L. A. Curtiss and F. Weinhold, *Chem. Rev.* 1988, **88**, 899.
- [28] M.-H. Baik, S. Mazumder, P. Ricci, J. R. Sawyer, Y.-G. Song, H. Wang and P. A. Evans, *J. Am. Chem. Soc.*, 2011, **133**, 7621.
